# Supplementary material for: Cdc42 regulates reactive oxygen species production in the pathogenic yeast Candida albicans
Source: PubMed Central journal article supplement (PMC8329510; doi:10.1016/j.jbc.2021.100917), 2021-06-25
Supplement: mmc1.pdf [file mmc1.pdf]

## Supporting Information

### **Cdc42 regulates reactive oxygen species production in the pathogenic yeast *Candida albicans***

Griffin P. Kowalewski<sup>1</sup>, Asia S. Wildeman<sup>1</sup>, Stéphanie Bogliolo<sup>2</sup> Angelique N. Besold<sup>1</sup>, Martine Bassilana<sup>2</sup> and Valeria C. Culotta<sup>1\*</sup>

<sup>1</sup>The Department of Biochemistry and Molecular Biology, Johns Hopkins University Bloomberg School of Public Health, Baltimore, MD 21205 USA

<sup>2</sup>Université Côte d'Azur, CNRS, INSERM, Institute of Biology Valrose (iBV), Parc Valrose, Nice, France

#### **List of materials**

Table S1: Primers

Table S1: Primers

| Primer Name   | Purpose                            | Sequence                                                                                                                           |
|---------------|------------------------------------|------------------------------------------------------------------------------------------------------------------------------------|
| CaFre8S1-AFP  | Construct Fre8-GFP strain          | 5'-GCAATGGTTGATGAATTACGTTGTCAAGTCATTAAGTTA<br>TAAATAATCCTGAAAAGAAAAGAGTTGATTTCTATGATCA<br>ATTACAAGGCTGGAGTGGTGGCTGGCGCAGGTGCTTC-3' |
| CaFre8S2      | Construct Fre8-GFP strain          | 5'-CAATTTAAAAAAAATCTATGTAAAGAACTAAAATCGATA<br>ATTAATGAGGAAAAGGGGGAAGGGAGATGAGTGAGT<br>GGGTATATTATCTCATCTGATATCATCGATGAATTCGAG-3'   |
| CaFRE8p2076   | PCR analysis of Fre8-GFP integrant | 5'-GGAAGAAGCTGGTAGAAGTATTGCC-3'                                                                                                    |
| GFPm106       | PCR analysis of Fre8-GFP integrant | 5'-CCGGAGACAGAAAATTTG-3'                                                                                                           |
| CaFRE8m2376   | PCR analysis of Fre8-GFP integrant | 5'-GGTGTAGCCACCAGAATGTTC-3'                                                                                                        |
| FRE8-forward  | qRT-PCR <i>FRE8</i>                | 5'-CTTTCCATCGTCATATTGCCAG-3'                                                                                                       |
| FRE8-reverse  | qRT-PCR <i>FRE8</i>                | 5'-GCTGTGCCCAAATCATAAATG-3'                                                                                                        |
| TUB2-forward  | qRT-PCR <i>TUB2</i>                | 5'-GAGTTGGTGATCAATTCAGTGCTAT-3'                                                                                                    |
| TUB2-reverse  | qRT-PCR <i>TUB2</i>                | 5'-ATGGCGGCATCTTCTAATGGGATTT-3'                                                                                                    |
| BEM1-forward  | qRT-PCR <i>BEM1</i>                | 5'-CATCAAGGCGATCACAAGTC-3'                                                                                                         |
| BEM1-reverse  | qRT-PCR <i>BEM1</i>                | 5'-TTGGTGGAGTACCACTTCCTG-3'                                                                                                        |
| CDC42-forward | qRT-PCR <i>CDC42</i>               | 5'-TCCCAATCACCCAGGAA-3'                                                                                                            |
| CDC42-reverse | qRT-PCR <i>CDC42</i>               | 5'-TGCAGCTACTATAGCCTCGTCAA-3'                                                                                                      |
| CDC24-forward | qRT-PCR <i>CDC24</i>               | 5'-ACGTGATTCCGACCTGTCATTTA-3'                                                                                                      |
| CDC42-reverse | qRT-PCR <i>CDC24</i>               | 5'-GATGGCGGGAAGTGTGAGA-3'                                                                                                          |
